# Supplementary material for: G3BP1 interacts with YWHAZ to regulate chemoresistance and predict adjuvant chemotherapy benefit in gastric cancer
Source: Br J Cancer. 2020 Sep 29;124(2):425–36. doi: 10.1038/s41416-020-01067-1 (PMC7852868; doi:10.1038/s41416-020-01067-1)
Supplement: Supplementary file 1 — Supplementary materials [file 41416_2020_1067_MOESM1_ESM.pdf]

**Supplementary Fig. 1**

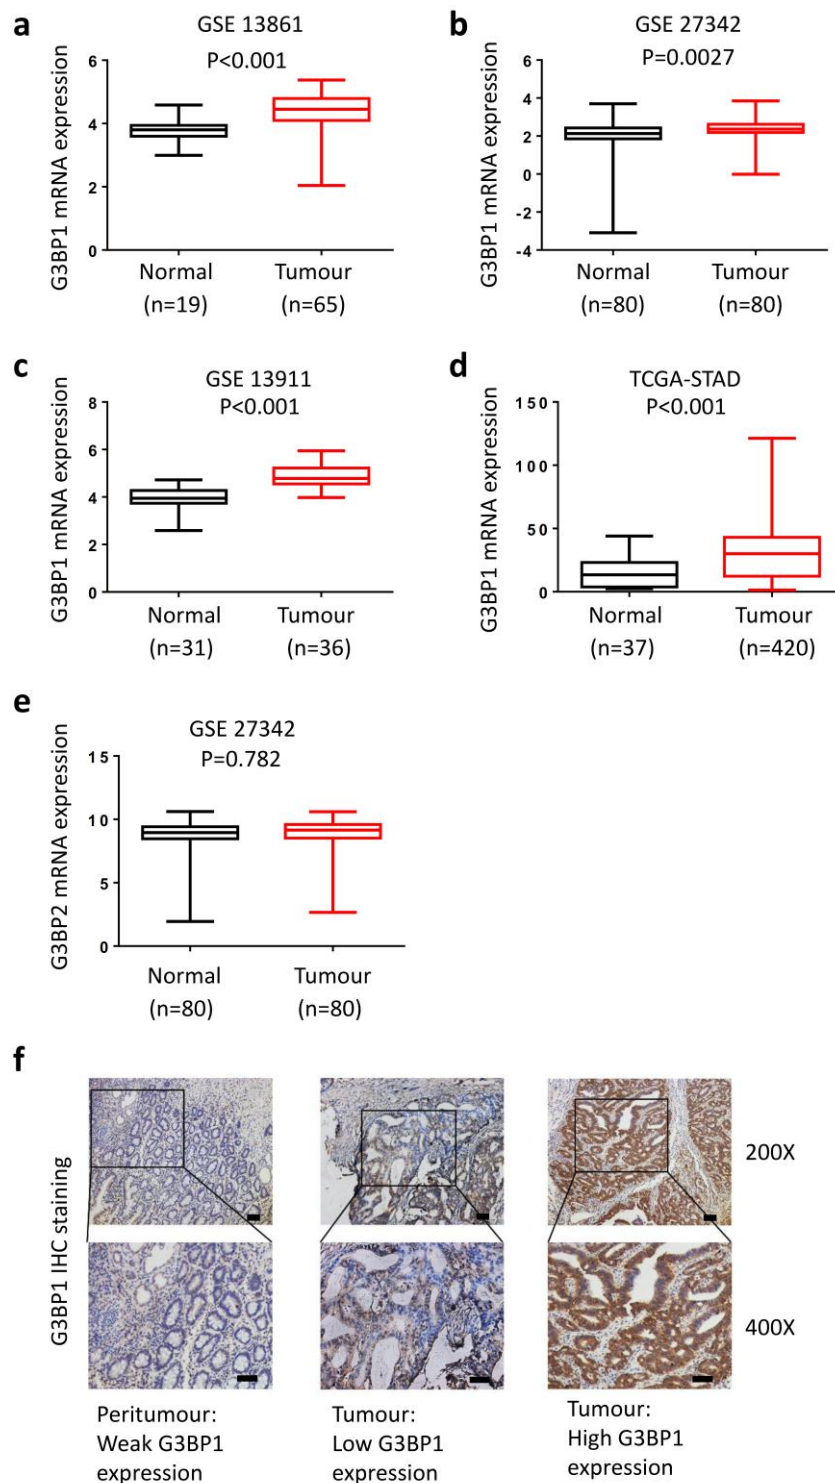

**Supplementary Fig. 1. The expression of G3BP1 but not G3BP2 was up-regulated in gastric cancer**

**(a-d)** The mRNA expression level of *G3BP1* in three datasets from GEO database

(GSE13861, GSE27342, GSE13911) and TCGA database. **(e)** The mRNA expression level of *G3BP2* in GEO database (GSE27342). **(f)** Representative images of G3BP1 IHC staining in peritumour and tumour tissues and its corresponding regional magnification images. Low and high expression of G3BP1 in tumour sections was determined by ROC analysis. Scale bar: 100  $\mu$ m. The box plot showed the full range of variation.

**Supplementary Fig. 2**

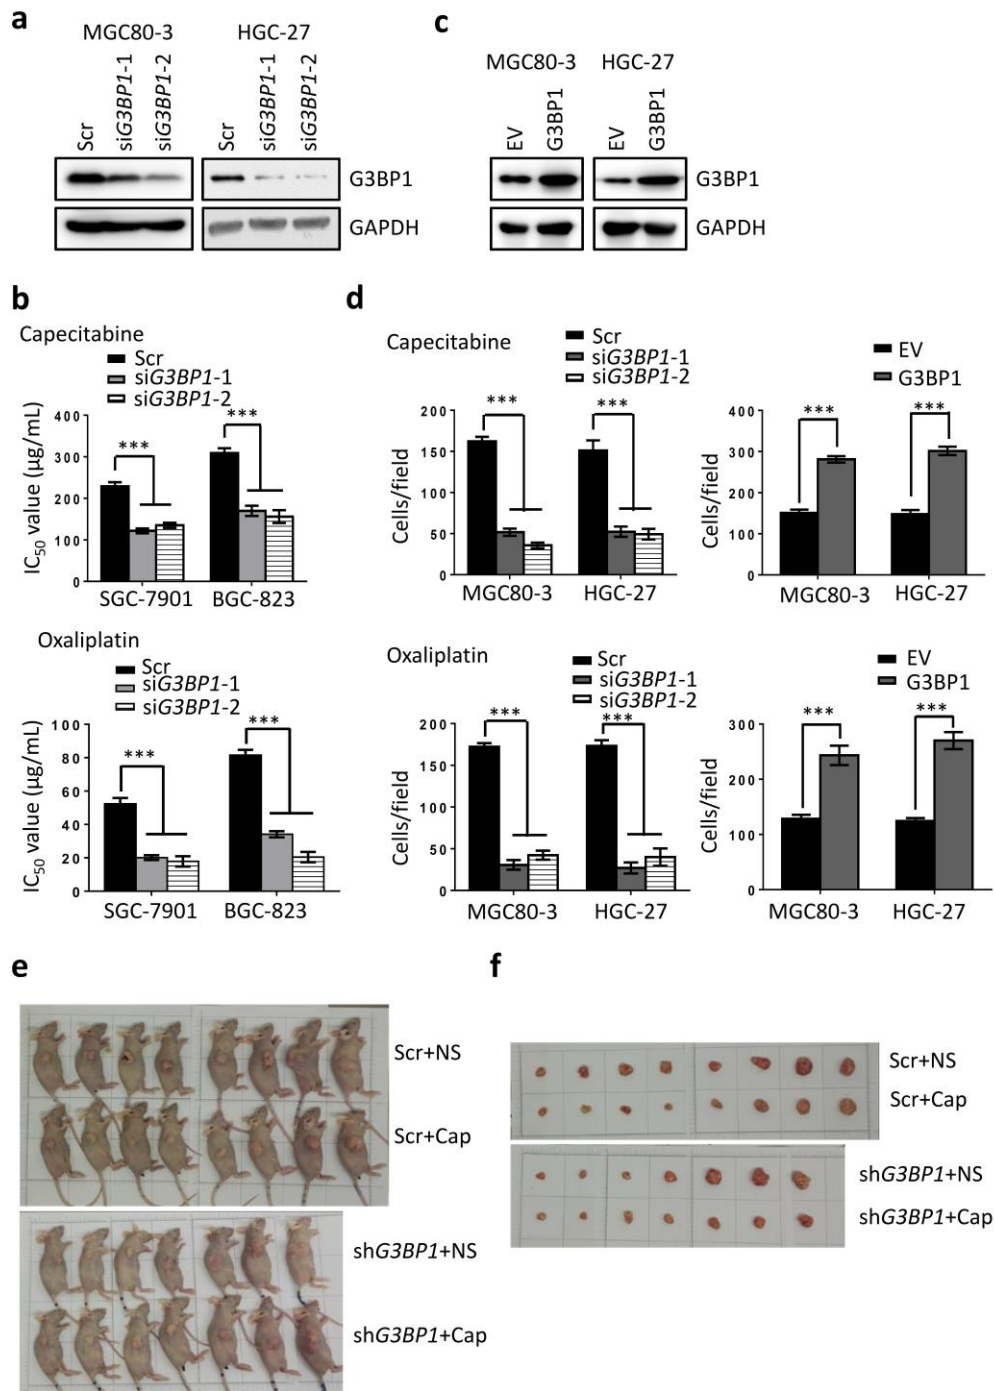

**Supplementary Fig. 2. G3BP1 enhanced gastric cancer resistance to chemo-drugs *in vitro* and *in vivo***

**(a)** Immunoblotting (IB) analysis of whole cell lysates (WCLs) derived from MGC80-3 and HGC-27 cells transfected with Scramble or siG3BP1. **(b)** SGC-7901 and BGC-

823 cells were transfected with scramble or si*G3BP1* and treated with capecitabine or oxaliplatin at gradient concentrations for 24 hours and the IC<sub>50</sub> values were examined by CCK-8 assay. The data were shown as mean  $\pm$ SD of three independent experiments. \*\*\*P < 0.001. (c) IB analysis of WCLs derived from MGC80-3 and HGC-27 cells transfected with pcDNA3.1 or pcDNA3-G3BP1. (d) The statistic results of colony formation assay refer to Fig. 2c. The data were shown as mean  $\pm$  SD of three independent experiments. \*\*\*P < 0.001. (e-f) Different groups of MGC80-3 cells ( $1 \times 10^7$  cells) were injected subcutaneously into the flanks of 6-week-old male Balb/c nude mice. When tumour volume reached approximately 100 mm<sup>3</sup>, each Balb/c nude mouse was randomly allocated into the chemotherapy group (injection with 200 mg/kg capecitabine intraperitoneally, 3 times per week) or control group (injection with normal saline). At 6 weeks post injection, the Balb/c nude mice were respectively sacrificed and tumour tissues were harvested. Images of four groups of mice were shown in (e) and the collected tumors were shown in (f). Scr: scramble; EV: empty vector; NS: normal saline; Cap: capecitabine.

### Supplementary Fig. 3

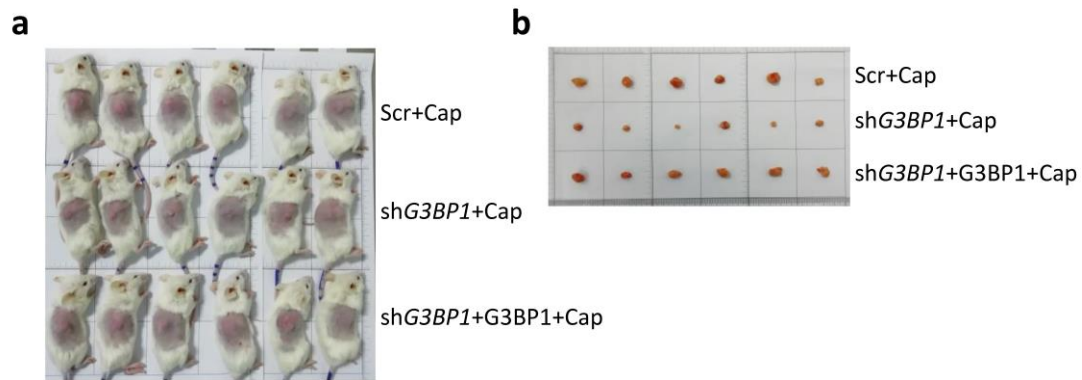

### Supplementary Fig. 3. Ectopic G3BP1 could reverse the reduced tumorigenesis of *shG3BP1* gastric cancer cells

**(a-b)** Different groups of MGC80-3 cells ( $1 \times 10^7$  cells) were injected subcutaneously into the flanks of 6-week-old male NOD-SCID mice. At 6 days after the injection, the NOD-SCID mice were injected with capecitabine intraperitoneally (100 mg/kg, 2 times per week). 3 weeks later, the mice were sacrificed and tumor tissues were harvested. Images of three groups of NOD-SCID mice were shown in (a) and the tumors were shown in (b). Scr: scramble; Cap: capecitabine.

**Supplementary Fig. 4**

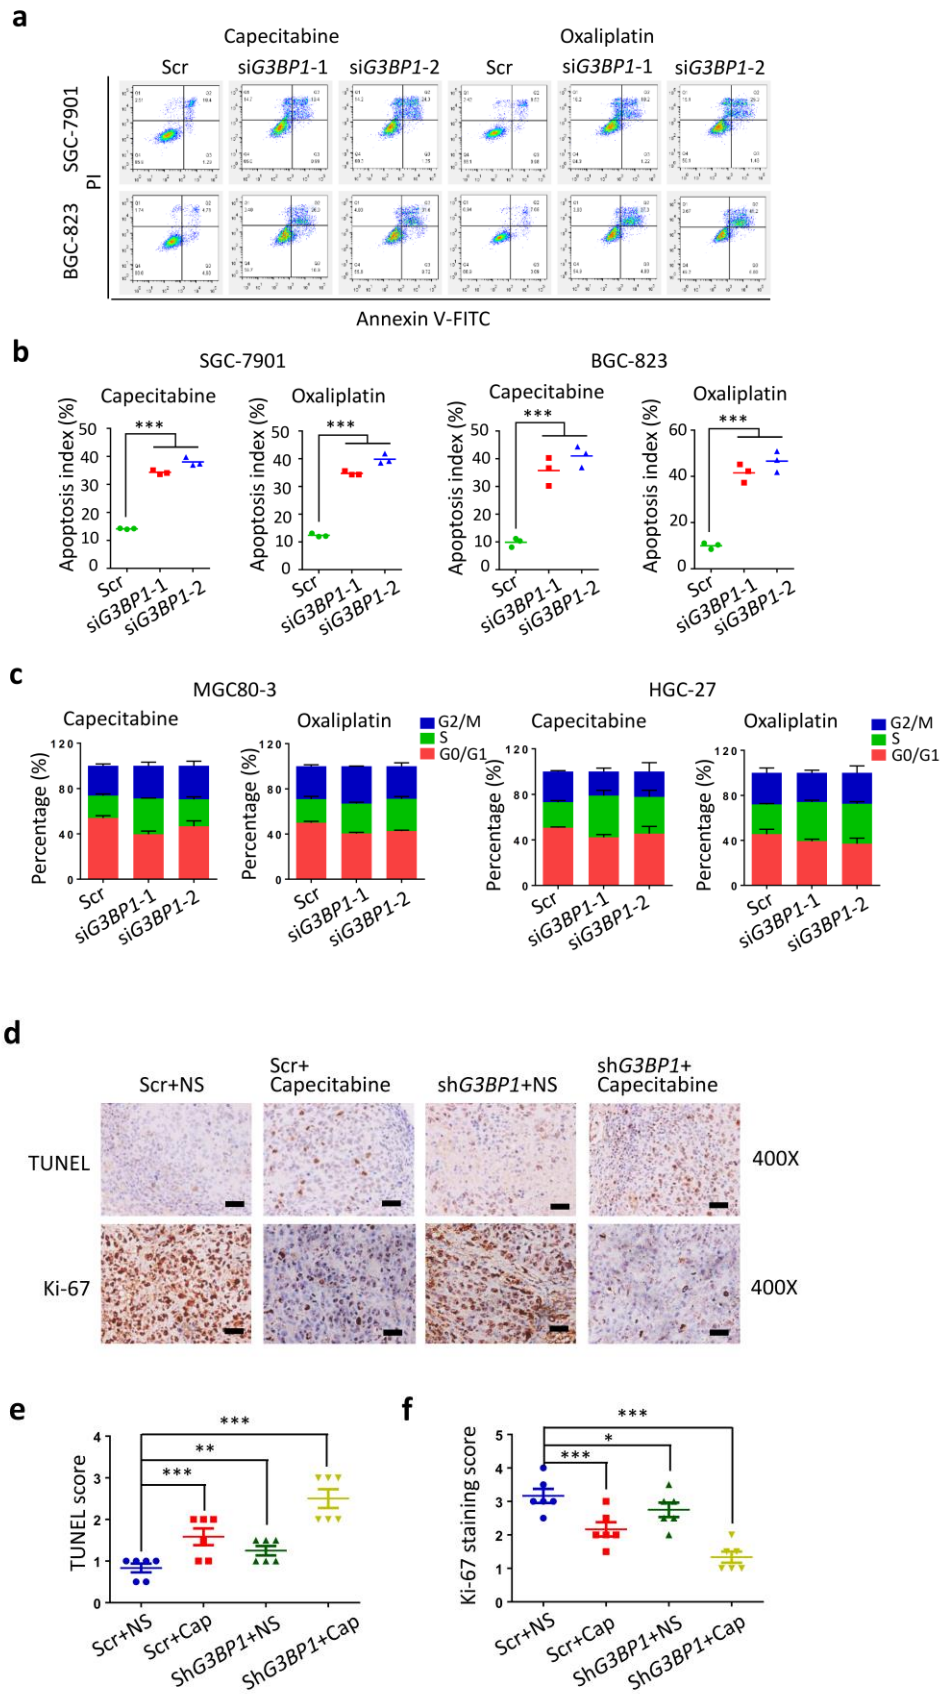

**Supplementary Fig. 4. The apoptosis level but not the cell cycle was significantly changed in gastric cancer cells when G3BP1 was knocked down**

**(a-b)** SGC-7901 and BGC-823 cells transfected with scramble or si*G3BP1* were treated with capecitabine (64 µg/mL) or oxaliplatin (8 µg/mL) for 12 hours and then stained with annexin V-FITC and propidium iodide (PI). Representative images were shown in **(a)** and quantification charts were shown in **(b)**. Data were shown as mean ± SD of three independent experiments. \*\*\**P* < 0.001. **(c)** MGC80-3 and HGC-27 cells transfected with scramble or si*G3BP1* were treated with capecitabine (64 µg/mL) or oxaliplatin (8 µg/mL) for 12 hours and then stained with propidium iodide (PI) for cell cycle analysis. Data were shown as mean ± SD of three independent experiments. **(d)** Representative images of TUNEL and Ki-67 IHC staining in subcutaneous tumour sections. Scale bar: 100 µm. **(e-f)** Statistical graphs of TUNEL or Ki-67 IHC staining score. Data were shown as mean ± SD. \**P* < 0.05, \*\**P* < 0.01, \*\*\**P* < 0.001. Scr: scramble; NS: normal saline; Cap: capecitabine.

**Supplementary Fig. 5**

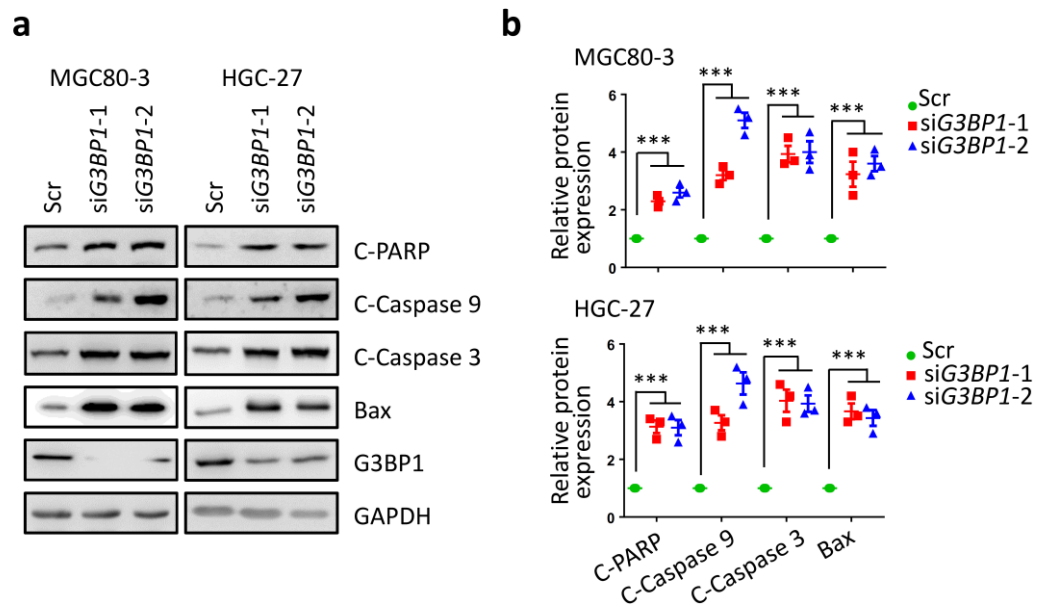

**Supplementary Fig. 5. Pro-apoptotic markers were elevated in gastric cancer cells when *G3BP1* was knocked down**

**(a)** IB analysis of WCLs derived from MGC80-3 and HGC-27 cells transfected with the indicated siRNAs by using anti-Cleaved PARP, anti-Cleaved Caspase-9, anti-Cleaved Caspase-3 or anti-Bax antibody. **(b)** The quantification results refer to **(a)**. Data were shown as mean  $\pm$  SD of three independent experiments. \*\*\*P < 0.001. Scr: scramble.

Supplementary Fig. 6

**a** Online database-Patients received adjuvant chemotherapy

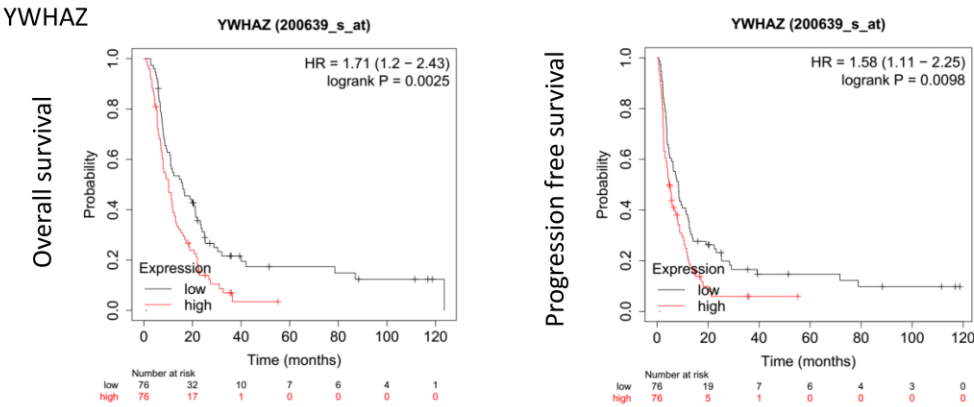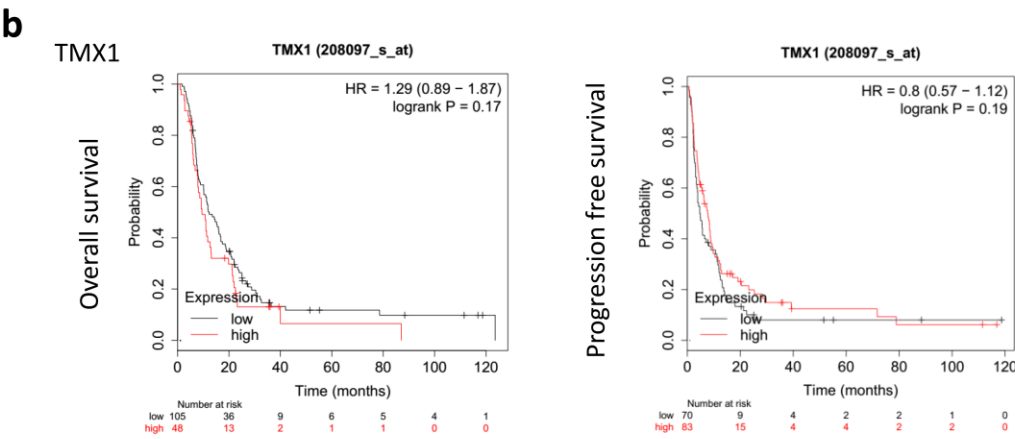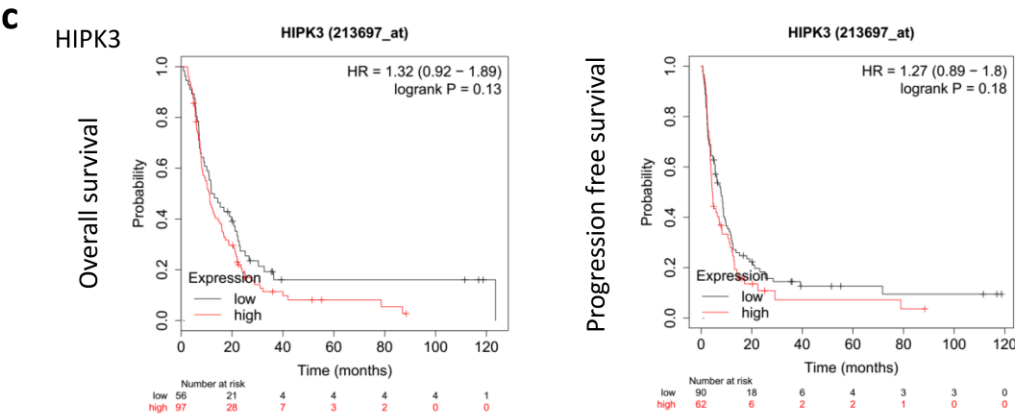

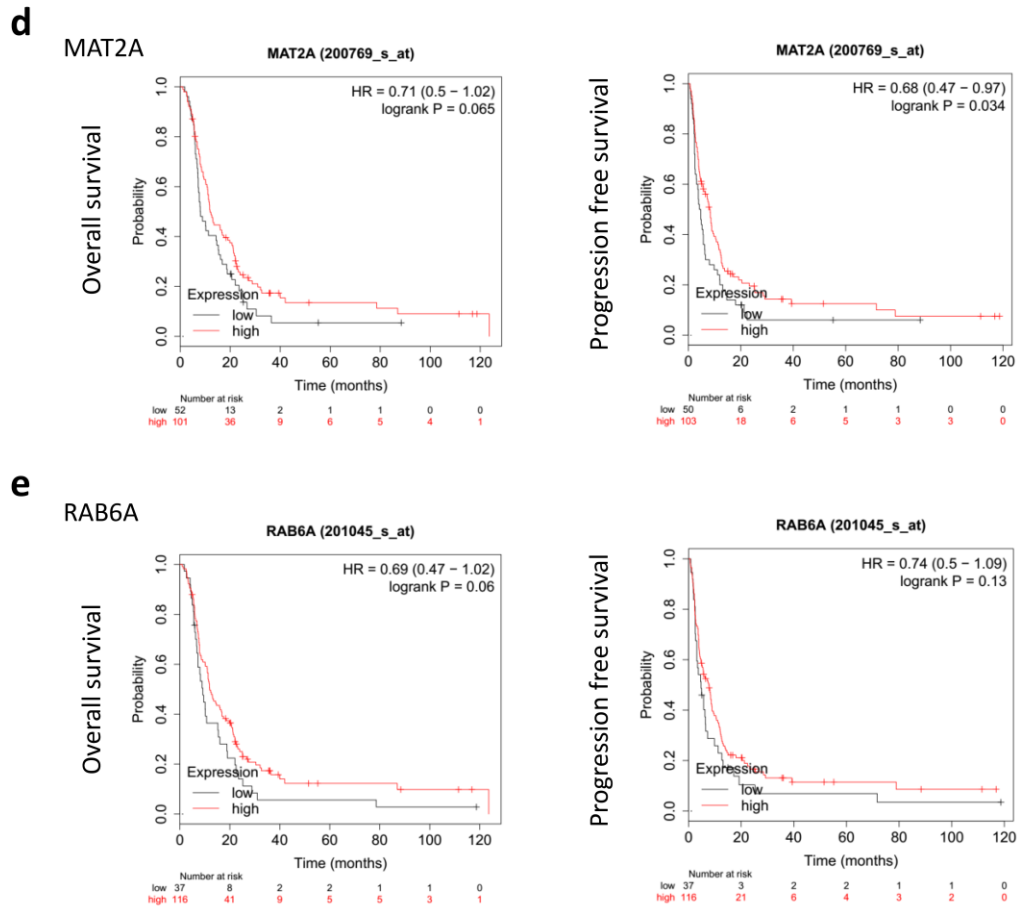

**Supplementary Fig. 6. Online database analysis showed that *YWHAZ* was correlated with poor outcome of gastric cancer patients receiving adjuvant chemotherapy**

**(a-e)** The association of *YWHAZ* (a), *TMX1* (b), *HIPK3* (c), *MAT2A* (d) and *RAB6A* (e) mRNA expression with overall survival or progression-free survival of gastric cancer patients receiving adjuvant chemotherapy by analyzing the GEO datasets (<http://www.kmplot.com/analysis/index.php?p=service&cancer=gastric>).

**Supplementary Fig. 7**

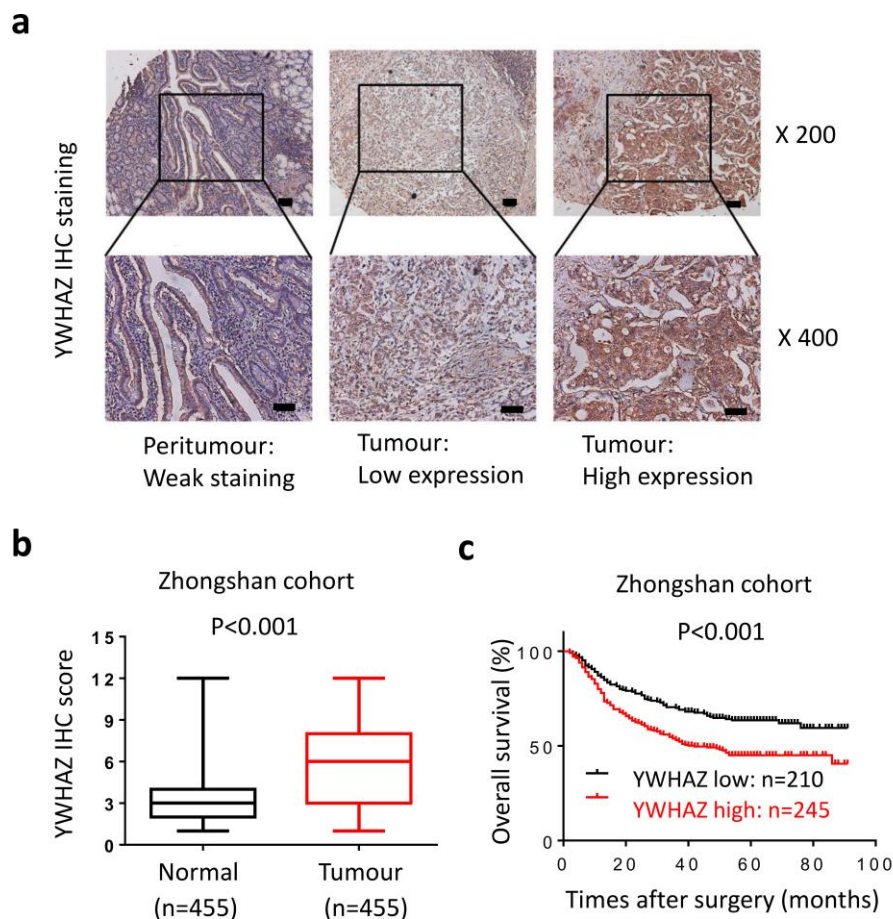

**Supplementary Fig. 7. YWHAZ was overexpressed and associated with worse prognosis in gastric cancer patients from Zhongshan cohort**

**(a)** Representative images of YWHAZ IHC staining in peritumour and tumour tissues and its corresponding regional magnification images. Low and high expression of YWHAZ in tumour sections was determined by ROC analysis. Scale bar: 100  $\mu$ m. **(b)** YWHAZ IHC scores in normal and tumour tissues from Zhongshan cohort (n=455). The box plot showed the full range of variation (error bars: min and max) with the line representing median. **(c)** Kaplan-Meier analysis for overall survival of gastric cancer patients according to YWHAZ expression (n=455).

## Supplementary Fig. 8

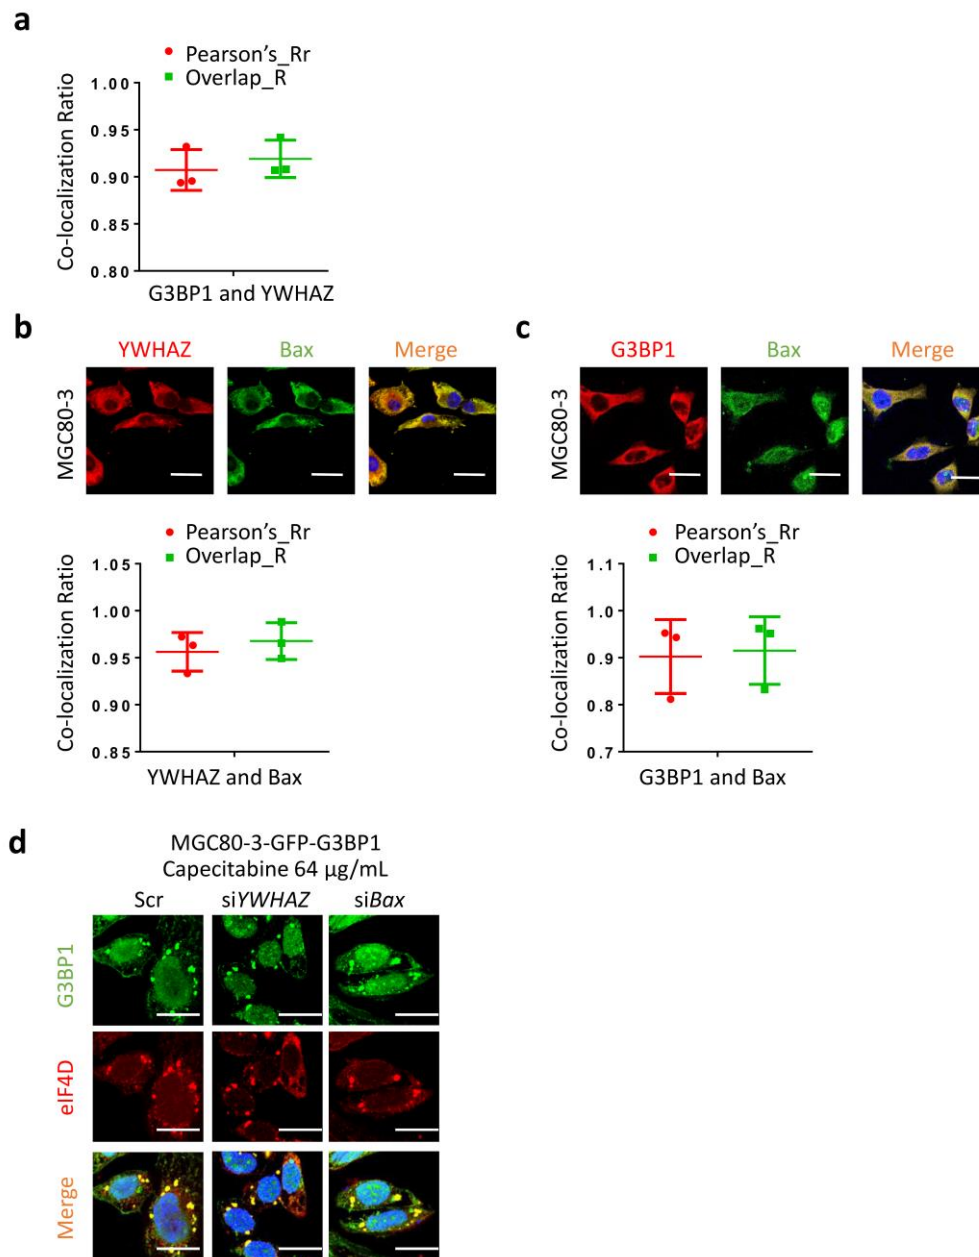

## Supplementary Fig. 8. Bax co-localized with YWHAZ and G3BP1

(a) The ratio quantification of co-localization in Fig. 5a. Both Pearson's correlation and Overlap coefficient were calculated by ImageJ software. (b) Representative images of co-localization of YWHAZ and Bax in MGC80-3 cells (upper panel) and the quantification was shown in lower panel. Scale bar: 25  $\mu$ m. (c) Representative images

of co-localization of G3BP1 and Bax in MGC80-3 cells (upper panel) and the quantification was shown in lower panel. Scale bar: 25  $\mu$ m. In a-c, data were shown as mean  $\pm$  SD of three independent experiments. **(d)** Representative images of immunofluorescence. MGC80-3-GFP-G3BP1 cells were transfected with scramble, si*YWHAZ* or si*Bax*, and then were treated with capecitabine (64  $\mu$ g/mL, 24 hours). The cells were fixed and stained by using anti-G3BP1 (1:50) and anti-eIF4D (1:100) antibodies. Scale bar: 25  $\mu$ m.

**Supplementary Fig. 9**

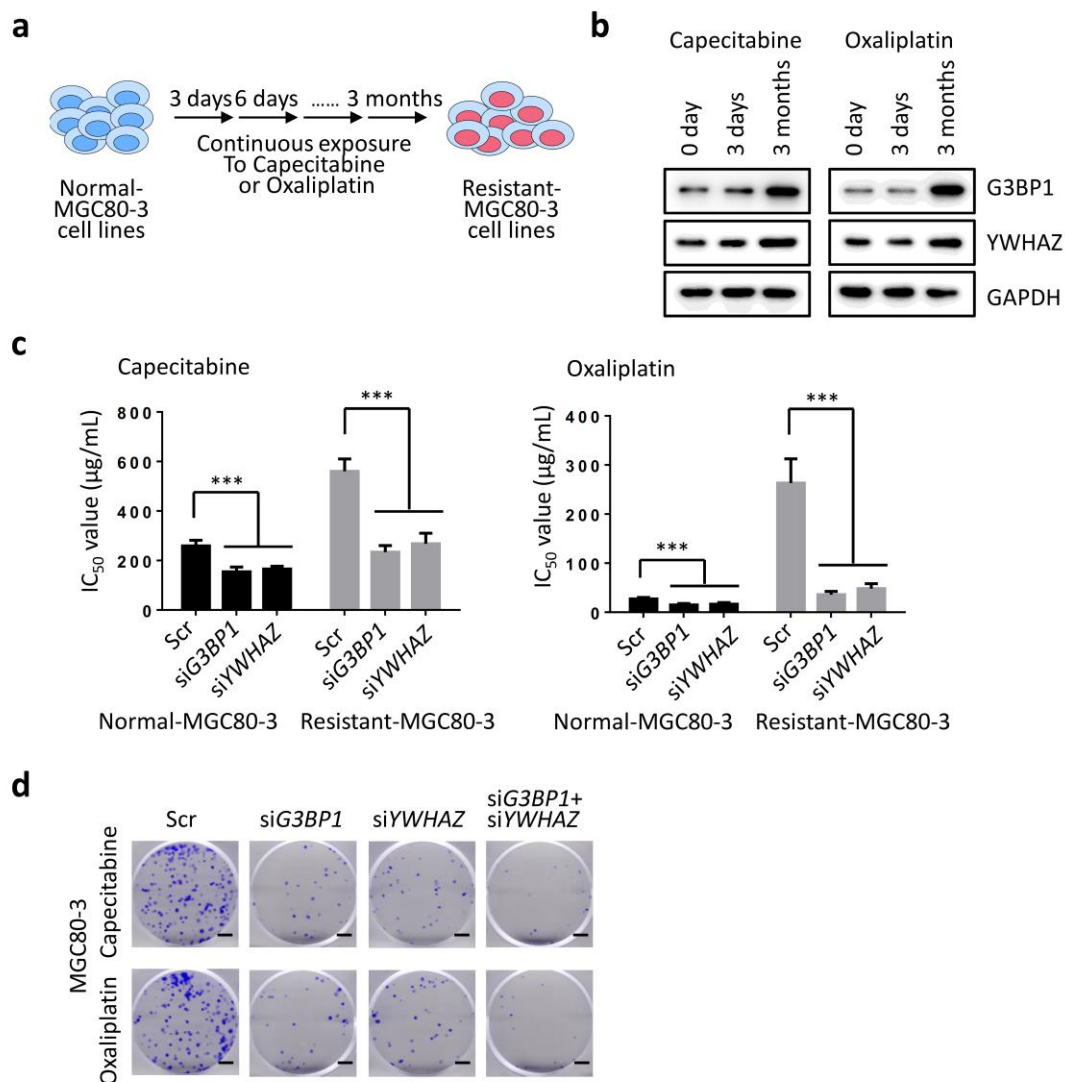

**Supplementary Fig. 9. G3BP1 and YWHAZ were upregulated and displayed larger impact on IC<sub>50</sub> values in drug-resistant cells**

(a) Schematic diagram showed the construction process of drug-resistant MGC80-3 cell lines. MGC80-3 cells were exposed to capecitabine or oxaliplatin with gradient increased concentration for 3 months. (b) Representative gel images of G3BP1 or YWHAZ protein expression in Normal MGC80-3 cells or cells exposed to chemo-drugs for 3 days or 3 months. (c) Normal-MGC80-3 or resistant-MGC80-3 cells were treated with capecitabine or oxaliplatin for 48 hours and the IC<sub>50</sub> values were examined

by CCK-8 assay. Data were shown as mean  $\pm$  SD of three independent experiments.

\*\*\* $P < 0.001$ . **(d)** The representative images of colony formation assay in Fig. 5g. Scale

Bar: 5 mm. Scr: scramble.

**Supplementary Table 1. Relation between intratumoral G3BP1 expression and clinical characteristics of gastric cancer in Zhongshan cohort**

| Factor                       | Patients   | G3BP1 expression |      | P-value          |
|------------------------------|------------|------------------|------|------------------|
|                              | No. (%)    | Low              | High |                  |
| <b>All patients</b>          | 455 (100)  | 210              | 245  |                  |
| <b>Age (years)</b>           |            |                  |      | 0.928            |
| ≤65                          | 177 (38.9) | 89               | 88   |                  |
| >65                          | 278 (61.1) | 141              | 137  |                  |
| <b>Gender</b>                |            |                  |      | 0.665            |
| Female                       | 147 (32.3) | 70               | 77   |                  |
| Male                         | 308 (67.7) | 140              | 168  |                  |
| <b>Localization</b>          |            |                  |      | <b>0.048</b>     |
| Proximal                     | 75 (16.5)  | 31               | 44   |                  |
| Middle                       | 97 (21.3)  | 36               | 61   |                  |
| Distal                       | 283 (62.2) | 143              | 140  |                  |
| <b>Differentiation</b>       |            |                  |      | 0.684            |
| Well + Moderately            | 86 (18.9)  | 38               | 48   |                  |
| Poorly                       | 369 (81.1) | 172              | 197  |                  |
| <b>Lauren classification</b> |            |                  |      | <b>0.015</b>     |
| Intestinal type              | 278 (61.1) | 114              | 164  |                  |
| Diffuse type                 | 151 (33.2) | 84               | 67   |                  |
| Mixed type                   | 26 (5.7)   | 12               | 14   |                  |
| <b>T classification</b>      |            |                  |      | <b>&lt;0.001</b> |
| T1                           | 67 (14.7)  | 54               | 13   |                  |
| T2                           | 39 (8.6)   | 21               | 18   |                  |
| T3                           | 141 (31.0) | 57               | 84   |                  |
| T4                           | 208 (45.7) | 78               | 130  |                  |
| <b>N classification</b>      |            |                  |      | <b>&lt;0.001</b> |
| N0                           | 123 (27.0) | 73               | 50   |                  |
| N1                           | 78 (17.1)  | 44               | 34   |                  |
| N2                           | 90 (19.8)  | 43               | 47   |                  |
| N3                           | 164 (36.1) | 50               | 114  |                  |
| <b>Distant metastasis</b>    |            |                  |      | 0.259            |
| No                           | 442 (97.1) | 206              | 236  |                  |
| Yes                          | 13 (2.9)   | 4                | 9    |                  |
| <b>TNM stage</b>             |            |                  |      | <b>&lt;0.001</b> |
| I                            | 72 (15.8)  | 57               | 15   |                  |
| II                           | 112 (24.6) | 53               | 59   |                  |
| III                          | 258 (56.7) | 96               | 162  |                  |
| IV                           | 13 (2.9)   | 4                | 9    |                  |
| <b>Vascular invasion</b>     |            |                  |      | <b>&lt;0.001</b> |
| No                           | 322 (70.8) | 171              | 151  |                  |
| Yes                          | 133 (29.2) | 39               | 94   |                  |

Abbreviation: TNM=tumour node metastasis. P-value < 0.05 marked in bold font shows statistical significant.

**Supplementary Table 2. G3BP1-coexpressed genes from  
online database**

| <b>No.</b> | <b>gene symbol</b> | <b>Correlation</b> | <b>No.</b> | <b>gene symbol</b> | <b>Correlation</b> |
|------------|--------------------|--------------------|------------|--------------------|--------------------|
| 1          | CAPRIN1            | 0.779              | 20         | ADAM10             | 0.649              |
| 2          | TOMM22             | 0.764              | 21         | ZFR                | 0.643              |
| 3          | SNRNP40            | 0.764              | 22         | ATP6AP2            | 0.643              |
| 4          | SEPT11             | 0.721              | 23         | HNRNPU             | 0.623              |
| 5          | ZNF207             | 0.691              | 24         | SCARB2             | 0.598              |
| 6          | HNRNPH1            | 0.672              | 25         | GNS                | 0.598              |
| 7          | EIF2S3             | 0.658              | 26         | RAB6A              | 0.590              |
| 8          | YWHAZ              | 0.649              | 27         | G3BP2              | 0.590              |
| 9          | TMX1               | 0.649              | 28         | RNFT1              | 0.562              |
| 10         | TMOD3              | 0.649              | 29         | CDV3               | 0.509              |
| 11         | SCAMP1             | 0.649              | 30         | TBL1XR1            | 0.486              |
| 12         | MAT2A              | 0.649              | 31         | DCUN1D1            | 0.486              |
| 13         | LIN7C              | 0.649              | 32         | TMEM30A            | 0.465              |
| 14         | HIPK3              | 0.649              | 33         | SYPL1              | 0.465              |
| 15         | EXOC5              | 0.649              | 34         | ZMYND11            | 0.445              |
| 16         | DDX3X              | 0.649              | 35         | CUL4B              | 0.431              |
| 17         | CD164              | 0.649              | 36         | C5orf24            | 0.431              |
| 18         | ATF2               | 0.649              | 37         | TMED2              | 0.422              |
| 19         | AGPS               | 0.649              |            |                    |                    |

**Supplementary Table 3. Functional enrichment of G3BP1-coexpressed genes**

| Term                                                                                            | Count | %    | P-value | Fold | FDR    |
|-------------------------------------------------------------------------------------------------|-------|------|---------|------|--------|
| GO:0016192-vesicle-mediated transport                                                           | 7     | 18.9 | 0.001   | 5.5  | 1.615  |
| GO:0006887-exocytosis                                                                           | 4     | 10.8 | 0.002   | 15.7 | 2.509  |
| GO:0008104-protein localization                                                                 | 8     | 21.6 | 0.002   | 4.1  | 2.891  |
| GO:0015031-protein transport                                                                    | 7     | 18.9 | 0.005   | 4.1  | 6.453  |
| GO:0045184-establishment of protein localization                                                | 7     | 18.9 | 0.005   | 4.1  | 6.738  |
| GO:0032940-secretion by cell                                                                    | 4     | 10.8 | 0.01    | 8.7  | 12.362 |
| GO:0046903-secretion                                                                            | 4     | 10.8 | 0.026   | 6.1  | 29.971 |
| GO:0006916-anti-apoptosis                                                                       | 3     | 8.1  | 0.032   | 10.3 | 35.706 |
| GO:0042493-response to drug                                                                     | 3     | 8.1  | 0.042   | 8.8  | 44.523 |
| GO:0000375-RNA splicing, via transesterification reactions                                      | 3     | 8.1  | 0.042   | 8.8  | 44.523 |
| GO:0000377-RNA splicing, via transesterification reactions with bulged adenosine as nucleophile | 3     | 8.1  | 0.042   | 8.8  | 44.523 |
| GO:0046907-intracellular transport                                                              | 5     | 13.5 | 0.05    | 3.4  | 50.295 |
| GO:0006626-protein targeting to mitochondrion                                                   | 2     | 5.4  | 0.07    | 26.5 | 63.086 |
| GO:0070585-protein localization in mitochondrion                                                | 2     | 5.4  | 0.07    | 26.5 | 63.086 |
| GO:0048193-Golgi vesicle transport                                                              | 3     | 8.1  | 0.072   | 6.6  | 63.723 |
| GO:0000398-nuclear mRNA splicing, via spliceosome                                               | 3     | 8.1  | 0.078   | 6.3  | 66.856 |
| GO:0009057-macromolecule catabolic process                                                      | 5     | 13.5 | 0.083   | 2.9  | 69.465 |
| GO:0007162-negative regulation of cell adhesion                                                 | 2     | 5.4  | 0.088   | 20.9 | 71.657 |
| GO:0002274-myeloid leukocyte activation                                                         | 2     | 5.4  | 0.094   | 19.6 | 74.047 |
| GO:0045321-leukocyte activation                                                                 | 3     | 8.1  | 0.094   | 5.6  | 74.154 |

Fold, fold enhancement; FDR, false discovery rate.
